# Supplementary material
Source: PubMed Central journal article supplement (PMC3269157)

## Supplemental Data

*Synthesis of the threo-epoxy (8R,9S,10R, syn-epoxy)- and erythro-epoxy (8R,9S,10S, anti-epoxy)-eicosanoates* – The synthetic approach is outlined in Scheme S1. Addition of 1,7-octadiyne to undecanal via the corresponding lithium acetylide afforded propargylic alcohol **1** in 44–59% (unoptimized) yield, along with the bis-adduct (not shown). The ester functionality was installed onto **1** by use of methyl chloroformate to give **2**. Partial reduction of diyne **2** to *Z,Z*-diene **3** was achieved by hydrogenation with Lindlar's catalyst in 92% yield. The Sharpless asymmetric epoxidation (1) of allylic alcohol **3** in the presence of L-(+)-diisopropyl tartrate afforded a (ca 2:3) mixture of two epoxides **4** and **5**, in addition to the unreactive allylic alcohol, 10*R*-**3** (41%). The two epoxides were separated by preparative TLC. Their stereochemical determination was made possible by comparison with *syn*-epoxy (*threo*-epoxy) alcohol **7**, which was obtained as a virtually single isomer by *syn*-selective hydroxyl-directed epoxidation (i.e., in the absence of tartrate ligand) of 10*R*-**3**. Titanium isopropoxide-mediated epoxidation (with *t*BuOOH) of *Z*-allylic alcohols are known to furnish high *syn* (*threo*) selectivity due to minimization of A<sup>1,3</sup> strain (1-3). Finally, standard hydrogenation of **4** and **7** delivered the corresponding methyl esters **6** and **8**, respectively. <sup>1</sup>H-NMR data for the *erythro* diastereomer **6** (360 MHz, CDCl<sub>3</sub>): δ 3.67, 3H, s, OCH<sub>3</sub>; 3.53, 1H, m, H10; 2.97, 1H, ddd, J<sub>7a,8</sub> = 6.9 Hz, J<sub>7b,8</sub> = 5.2 Hz, J<sub>8,9</sub> = 4.2 Hz, H8; 2.83, 1H, dd, J<sub>8,9</sub> = 4.2 Hz, J<sub>9,10</sub> = 7.7 Hz; 2.32 1H, t, H2; ~1.25-1.7, m H3-7, H11-19; 0.88, 3H, t, H20. NMR data for the *threo* diastereomer **8**: δ 3.67, 3H, s, OCH<sub>3</sub>; 3.48, 1H, m, H10; 3.03, 1H, m, H8; 2.885, 1H, dd, J<sub>8,9</sub> = 4.4 Hz, J<sub>9,10</sub> = 7.9 Hz, H9; 2.32, 2H, t, H2; ~1.25-1.7, m H3-7, H11-19; 0.88, 3H, t, H20.

Of note, the 9,10 coupling constants for *erythro* and *threo* on NMR are too close to be diagnostic (7.7 versus 7.9 Hz). The epoxide protons H8 and H9 are both slightly downfield in the *threo* isomer (cf. Fig. 2). The published values for epoxidized 2-hydroxy-3*Z*-pentenol indicate that H3 (the equivalent of our H9) is downfield in *threo*, which agrees with our result, but H4 (the equivalent of our H8) has an identical chemical shift in *erythro* and *threo* (2).

On TLC of the methyl esters (hexane:ethyl acetate, 3:1), *erythro* was the less polar (higher R<sub>f</sub>) diastereomer. On GC of the methyl ester TMS ether derivatives, the *erythro* diastereomer eluted later than *threo* (Results, main text).

## References

1. Martin, V. S., S. S. Woodard, T. Katsuki, Y. Yamada, M. Ikeda, and K. B. Sharpless. 1981. Kinetic resolution of racemic allylic alcohols by enantioselective epoxidation - a route to substances of absolute enantiomeric purity. *J. Am. Chem. Soc.* **103**: 6237-6240.
2. Adam, W., A. Corma, T. I. Reddy, and M. Renz. 1997. Diastereoselective catalytic epoxidation of chiral allylic alcohols by the TS-1 and Ti-beta zeolites: Evidence for a hydrogen-bonded, peroxy-type loaded complex as oxidizing species. *J. Org. Chem.* **62**: 3631-3637.
3. Cui, M., W. Adam, J. H. Shen, X. M. Luo, X. J. Tan, K. X. Chen, R. Y. Ji, and H. L. Jiang. 2002. A density-functional study of the mechanism for the diastereoselective epoxidation of chiral allylic alcohols by the titanium peroxy complexes. *J. Org. Chem.* **67**: 1427-1435.

Scheme S1

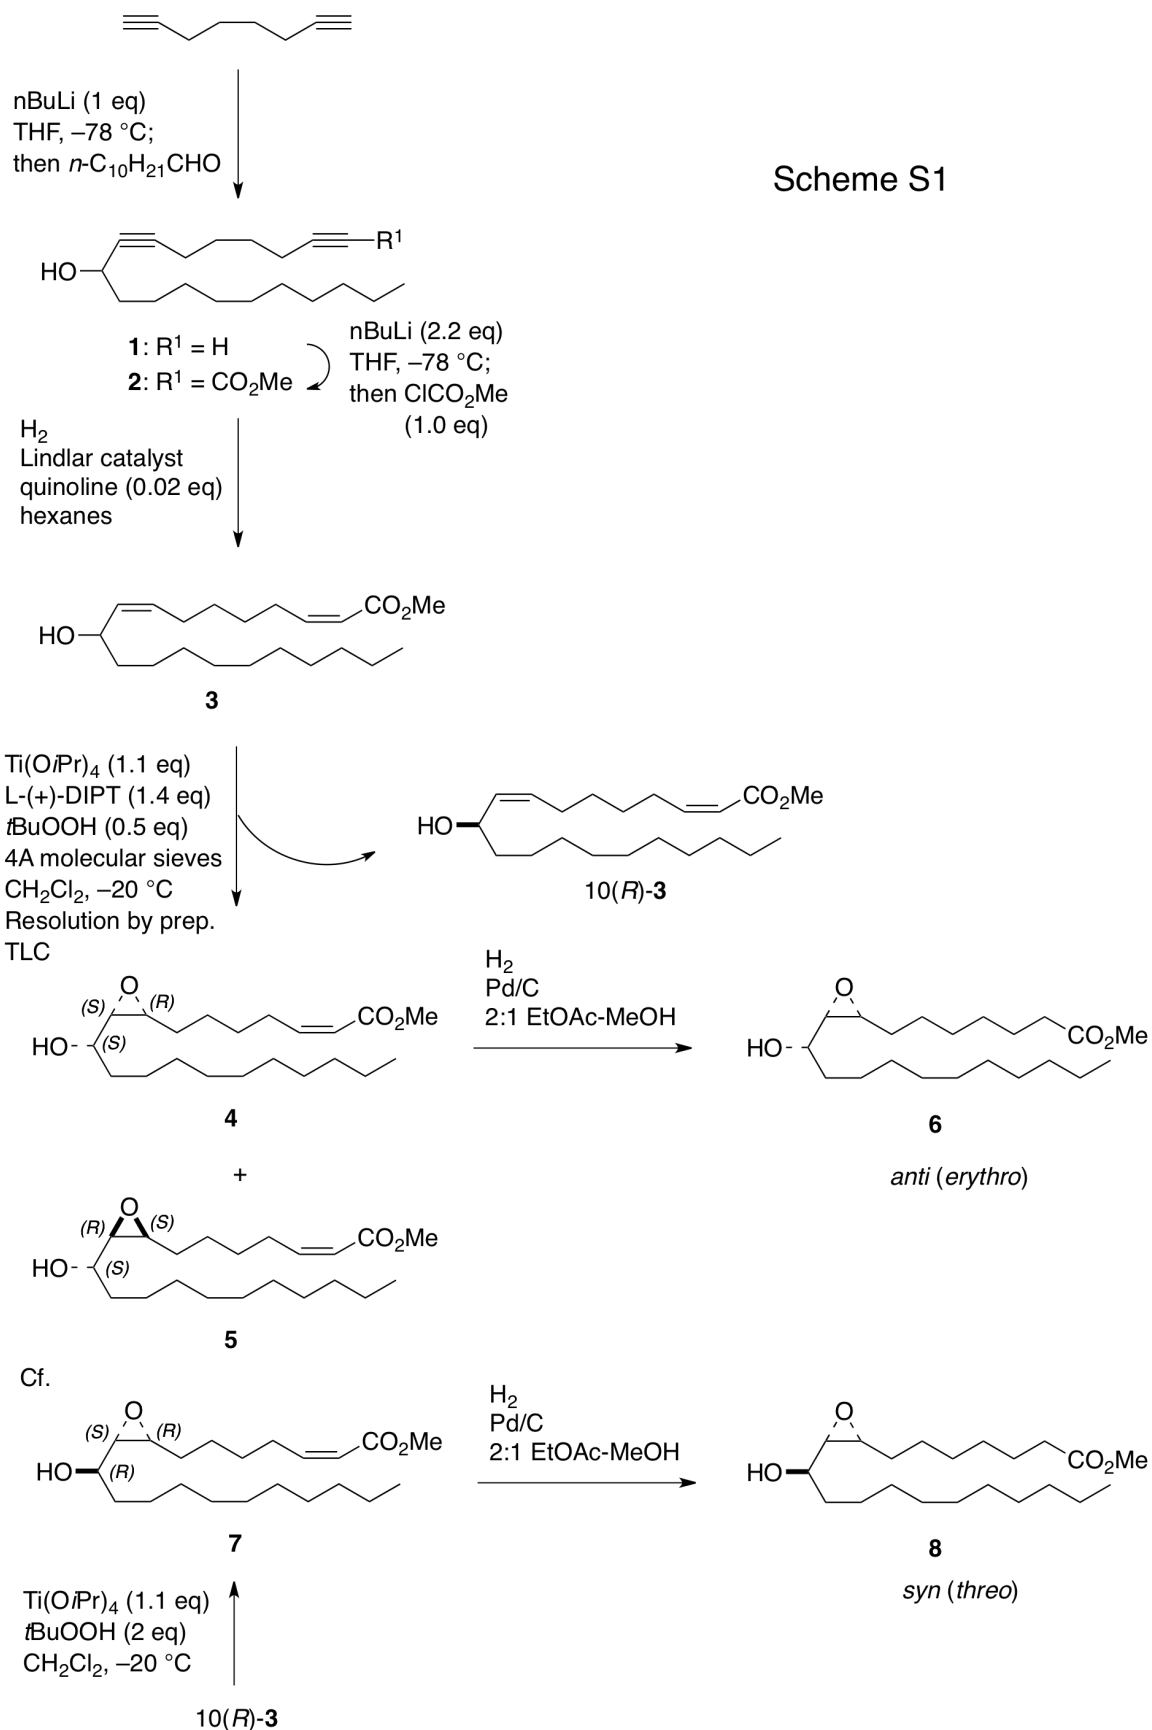

Table S1. <sup>1</sup>H-NMR (500 MHz) of the 20:3ω6-derived epoxyalcohol methyl ester in CDCl<sub>3</sub>

| Chemical shift (ppm) | # of protons | Multiplicity       | Proton(s) [carbon no.] | Coupling constants (Hz)                       |
|----------------------|--------------|--------------------|------------------------|-----------------------------------------------|
| 0.9                  | 3            | t                  | H20                    | $J_{19,20} = 7$                               |
| 1.26-1.44            | 12           | m                  | H4,5,6,17,18,19        |                                               |
| 1.6-1.8              | 4            | m                  | H3,7                   |                                               |
| 2.06                 | 2            | dt                 | H16                    | $J_{15,16} = 7.3, J_{16,17} = 7.3$            |
| 2.32                 | 2            | t                  | H2                     | $J_{2,3} = 7.5$                               |
| 2.89                 | 2            | m                  | H13a, 13b              |                                               |
| 2.96                 | 1            | dd                 | H9                     | $J_{8,9} = 4.1, J_{9,10} = 7.6$               |
| 3.03                 | 1            | ddd                | H8                     | $J_{7a,8} = 6.8, J_{7b,8} = 5.5, J_{8,9} = 4$ |
| 3.68                 | 3            | s                  | -OCH <sub>3</sub>      |                                               |
| 4.47                 | 1            | dt                 | H10                    | $J_{9,10} = J_{10,11} = 7.7; J_{9,OH} = 2^*$  |
| 5.34                 | 1            | dt                 | H14                    | $J_{13,14} = 7.3, J_{14,15} = 11$             |
| 5.44                 | 1            | dt                 | H15                    | $J_{14,15} = 11, J_{15,16} = 7.3$             |
| 5.56                 | 1            | dd<br>(unresolved) | H11                    | $J_{10,11} \approx J_{11,12} = \sim 10$       |
| 5.65                 | 1            | dt                 | H12                    | $J_{11,12} = 11, J_{12,13} = 7.7$             |

\* The small extra coupling (designated as  $J_{9,OH} = 2$ ), was not evident in other spectra acquired in CDCl<sub>3</sub> at 400 MHz.

Table S2. <sup>1</sup>H-NMR data on the 20:3ω6-derived epoxyalcohol methyl ester in C<sub>6</sub>D<sub>6</sub>

| Chemical shift (ppm) | # of protons | Multiplicity | Proton(s) [carbon no.] | Coupling constants (Hz)                                   |
|----------------------|--------------|--------------|------------------------|-----------------------------------------------------------|
| 0.89                 | 3            | t            | H20                    | $J_{19,20} = 6.9$                                         |
| 1.1-1.4              | 12           | m            | H4,5,6,17,18,19        |                                                           |
| 1.22                 | 1            | d            | 10-OH                  | $J = 3.6$                                                 |
| 1.5-1.6              | 4            | m            | H3,7                   |                                                           |
| 2.03                 | 2            | dt           | H16                    | $J_{15,16} = 6.8, J_{16,17} = 6.8$                        |
| 2.09                 | 2            | t            | H2                     | $J_{2,3} = 7.5$                                           |
| 2.74                 | 1            | dt           | H8                     | $J_{7,8} = 5.7, J_{8,9} = 4$                              |
| 2.82                 | 1            | dd           | H9                     | $J_{8,9} = 4, J_{9,10} = 7.4$                             |
| 2.91                 | 2            | m            | H13a, 13b              |                                                           |
| 3.36                 | 3            | s            | -OCH <sub>3</sub>      |                                                           |
| 4.39                 | 1            | dt           | H10                    | $J_{10,11} \approx J_{9,10} = 7.3,$<br>$J_{10,OH} = 3.6,$ |
| 5.4-5.5              | 2            | m            | H12,15                 |                                                           |
| 5.5-5.6              | 2            | m            | H11,14                 |                                                           |

Supplemental Figure S1:

S1-A: Separation on gas chromatography of *threo* and *erythro* standards of 8*R*,9*S*-epoxy-10-hydroxy-eicosanoates as the methyl ester TMS ether derivative.

S1-B: Electron impact mass spectrum of authentic *threo* epoxyalcohol, 8*R*,9*S*-epoxy-10-hydroxy-eicosanoate as the methyl ester TMS ether derivative.

S1-C: Electron impact mass spectrum of authentic *erythro* epoxyalcohol, 8*R*,9*S*-epoxy-10-hydroxy-eicosanoate as the methyl ester TMS ether derivative.

S1-D: Electron impact mass spectrum of the epoxyalcohol (after hydrogenation, as the methyl ester TMS ether derivative) from the incubation of *P. homomalla* extracts with 20:3 $\omega$ 6. The retention time and mass spectrum match the authentic *erythro* diastereomer of 8*R*,9*S*-epoxy-10-hydroxy-eicosanoate.

Figure S2-A: Separation on gas chromatography of *threo* and *erythro* standards of 8*R*,9*S*-epoxy-10-hydroxy-eicosanoate as the methyl ester TMS ether derivative.

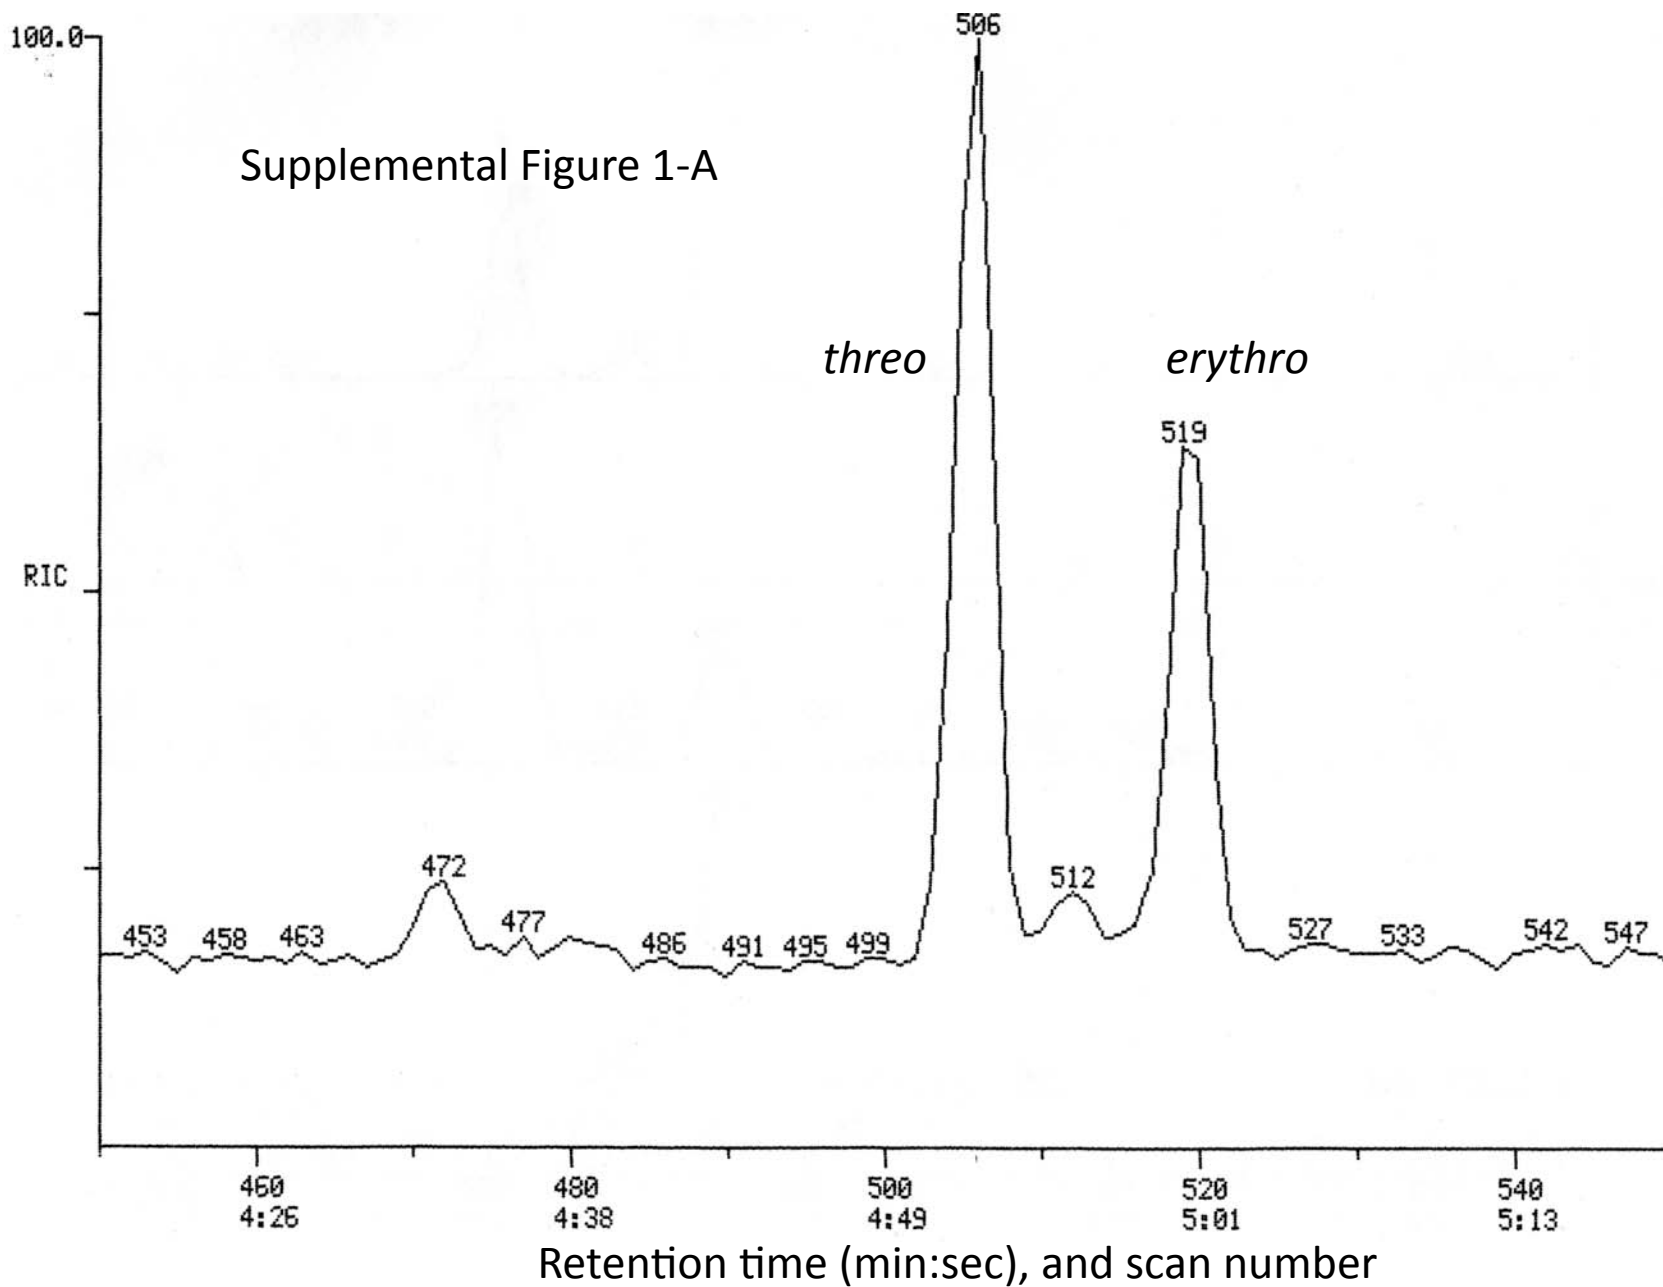

S2-B: Electron impact mass spectrum of authentic *threo* epoxyalcohol, 8*R*,9*S*-epoxy-10-hydroxy-eicosanoate as the methyl ester TMS ether derivative.

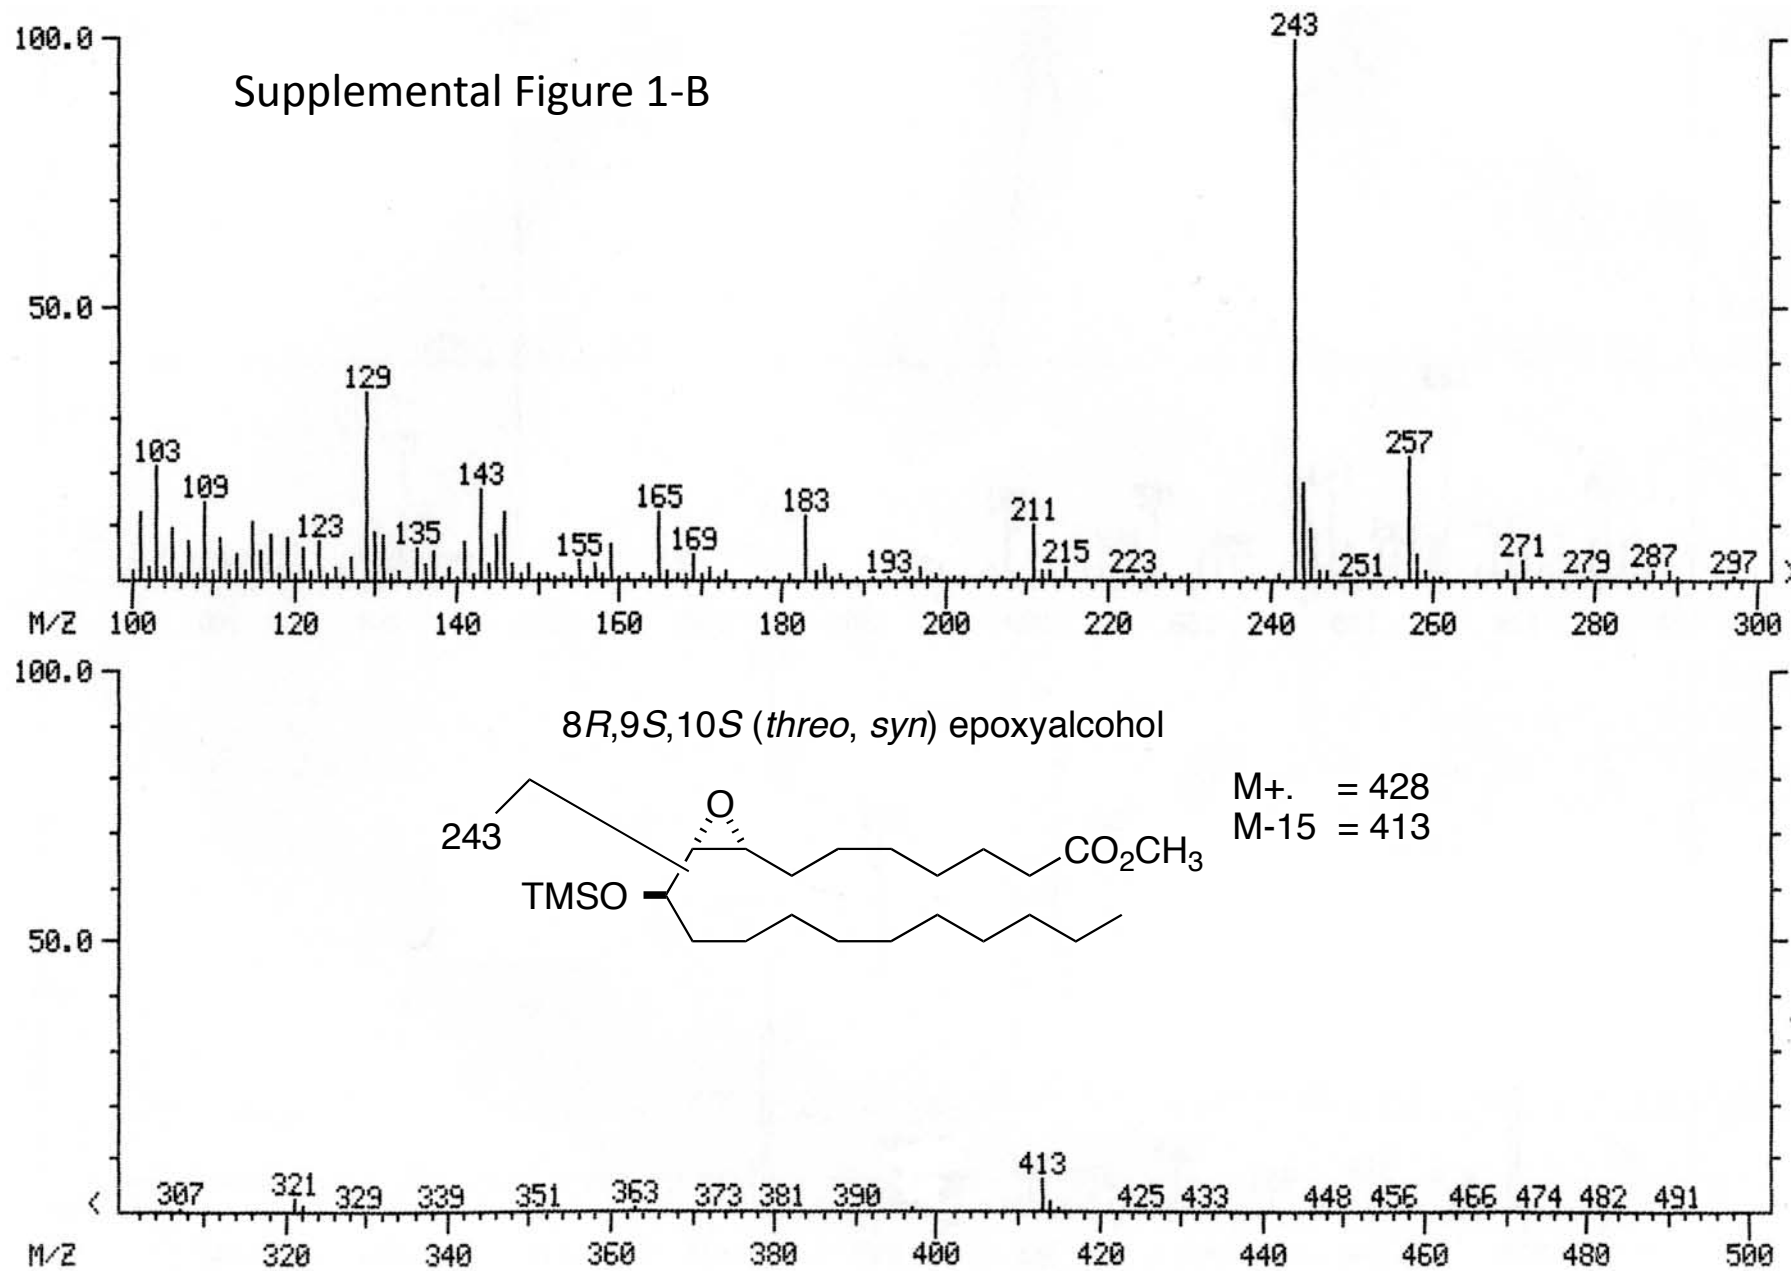

S2-C: Electron impact mass spectrum of authentic *erythro* epoxyalcohol, 8*R*,9*S*-epoxy-10-hydroxy-eicosanoate as the methyl ester TMS ether derivative.

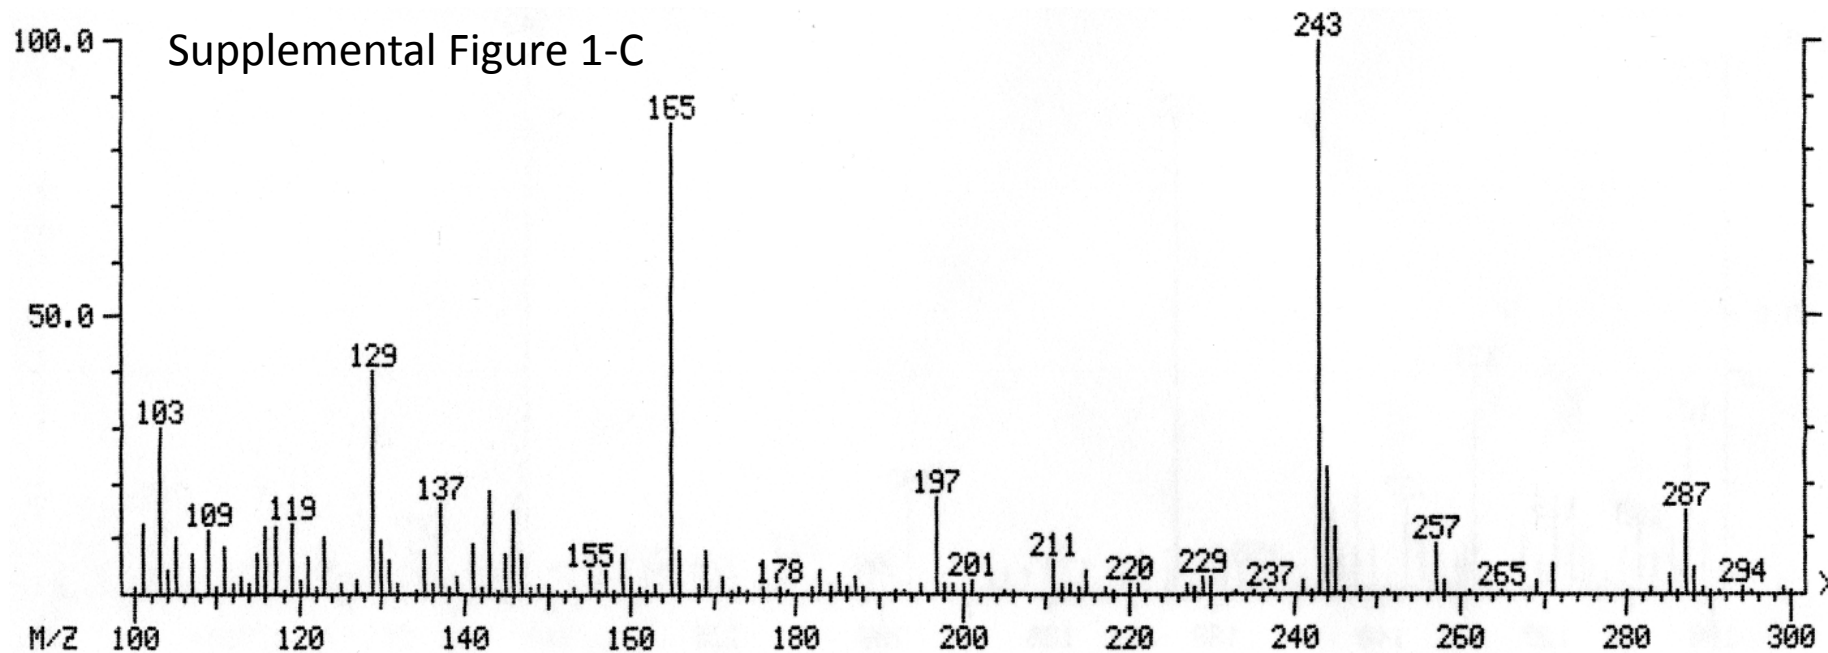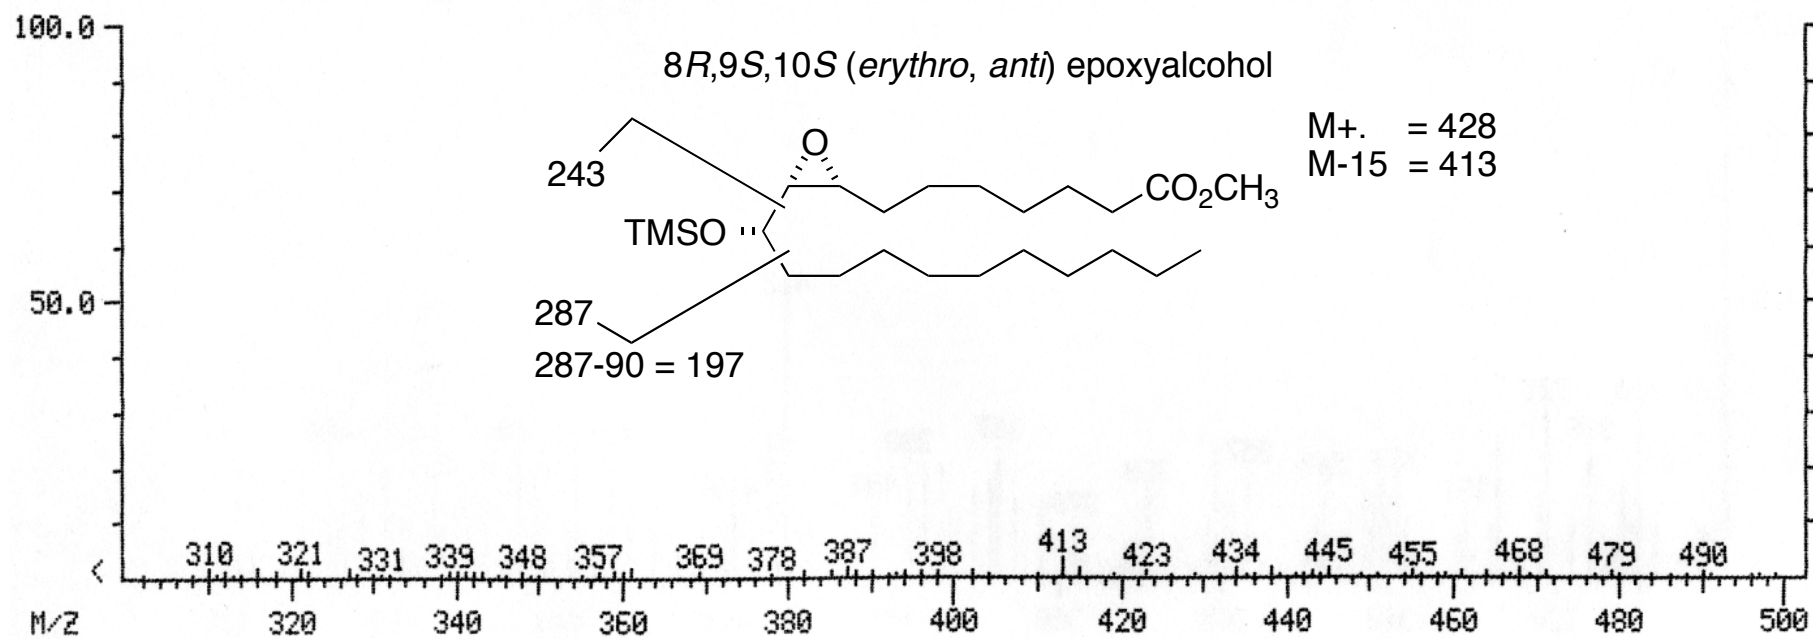



S2-D: Electron impact mass spectrum of the epoxyalcohol (after hydrogenation, as the methyl ester TMS ether derivative) from the incubation of *P. homomalla* extracts with 20:3 $\omega$ 6. The retention time and mass spectrum match the authentic *erythro* diastereomer of 8*R*,9*S*-epoxy-10-hydroxy-eicosanoate.

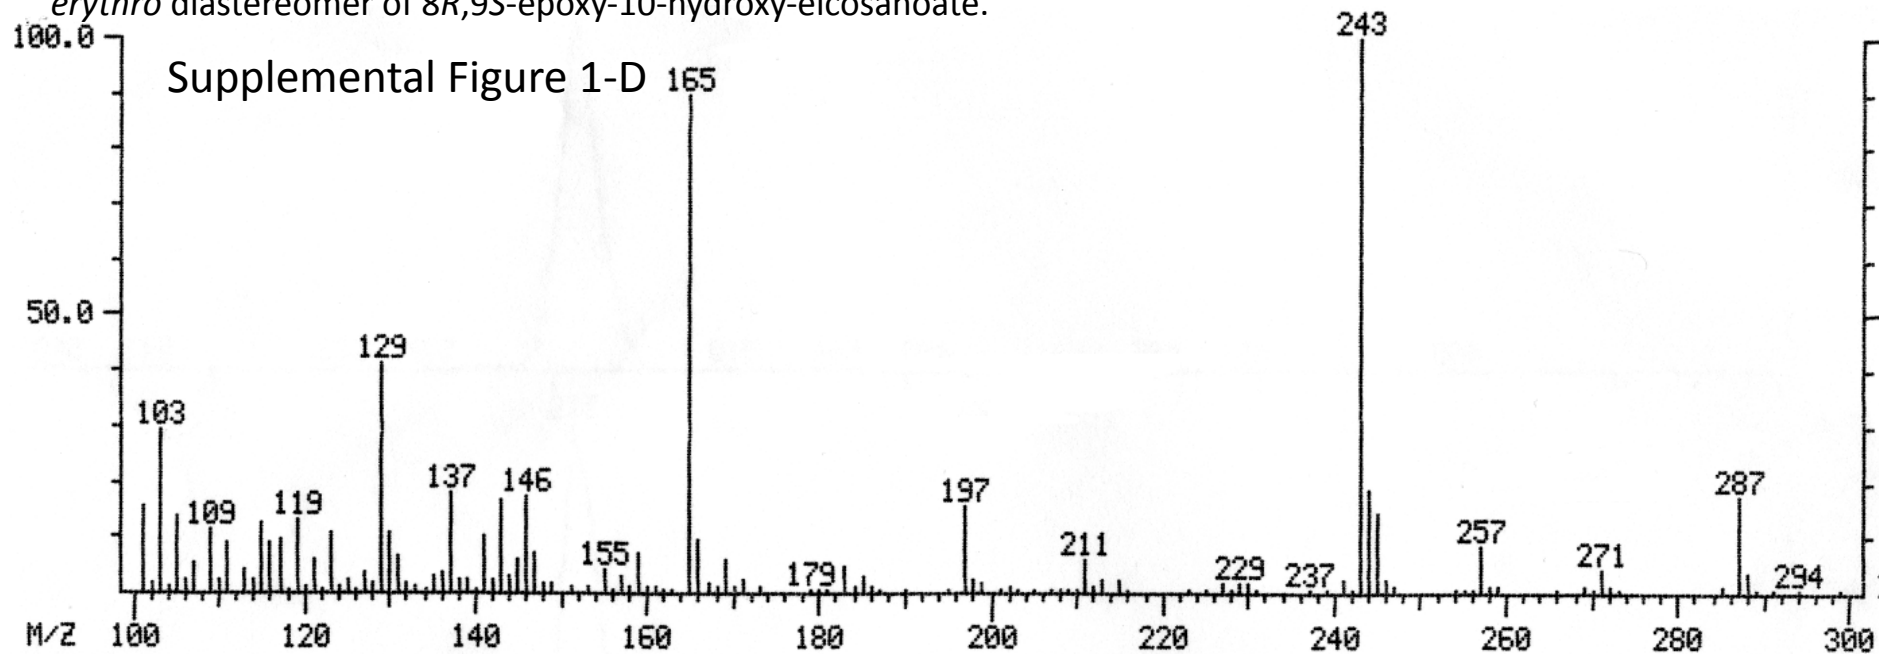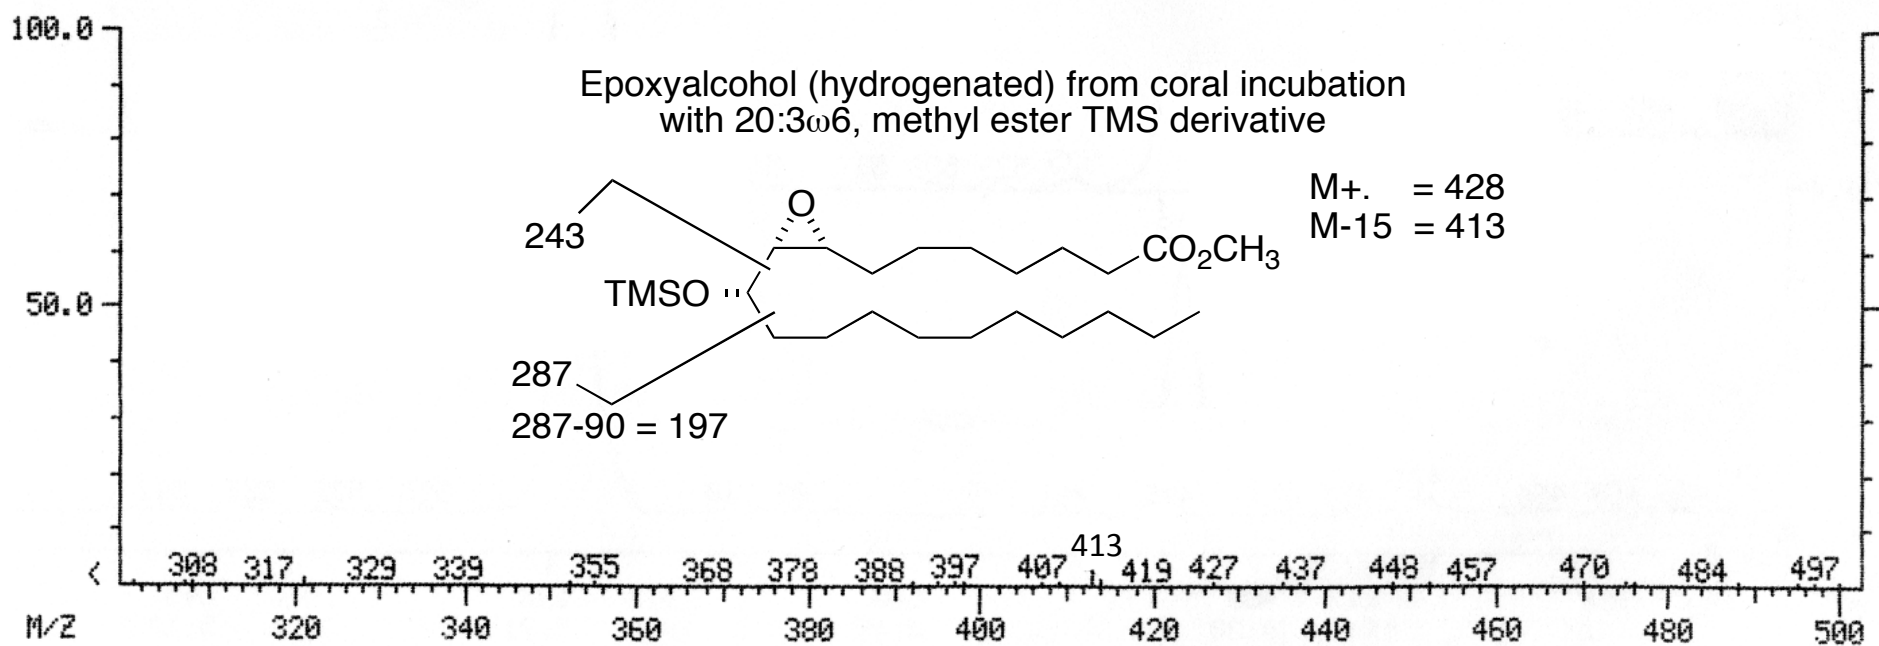

Figure S2

**Mass spectrometric analysis of oxygen-18 incorporation in the epoxyalcohol product**

Epoxyalcohol formed by biosynthesis from 20:3 $\omega$ 6 by *P. homomalla* extracts in the presence of  $^{18}\text{O}_2$  gas. The product was purified from the  $^{18}\text{O}_2$  incubation, hydrogenated, and analyzed as the PFB ester, TMS ether derivatives by GC-MS in the negative ion/chemical ionization mode. Partial mass spectral recordings of the prominent M-PFB ion of unlabeled epoxyalcohol (left side), and  $^{18}\text{O}$ -labeled epoxyalcohol (right side).

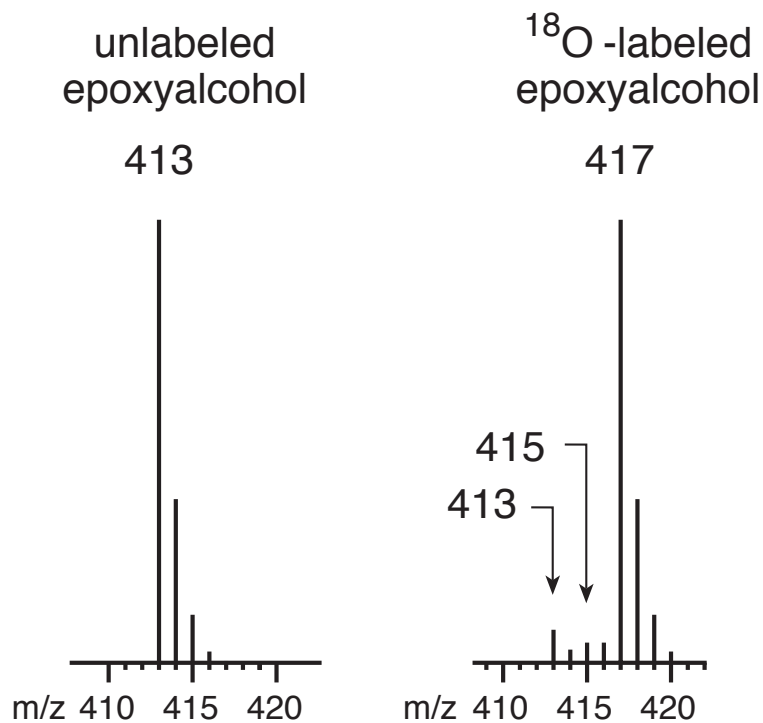

Supplement: supp_M022863_jlr.M022863-1.pdf [file supp_M022863_jlr.M022863-1.pdf]
